# Supplementary material for: Pressure-induced reversible framework rearrangement and increased polarization in the polar [NH4][Cd(HCOO)3] hybrid perovskite
Source: Royal Society of Chemistry journal article supplement (doi:10.1039/c9qi00749k), 2019-01-01
Supplement: c9qi00749k1.pdf [file c9qi00749k1.pdf]

## ELECTRONIC SUPPLEMENTARY INFORMATION

### Pressure-induced reversible framework rearrangement and increased polarization in the polar $[\text{NH}_4][\text{Cd}(\text{HCOO})_3]$ hybrid perovskite

Juan Manuel Bermúdez-García<sup>a</sup>, Alberto García-Fernández<sup>a</sup>, Adrián Andrada-Chacón<sup>b</sup>, Javier Sánchez-Benítez<sup>b</sup>, Wei Ren<sup>c,d</sup>, Shunbo Hu<sup>c,d</sup>, Gu Teng<sup>e</sup>, Hongjun Xiang<sup>e</sup>, Malgorzata Biczysko<sup>f</sup>, Socorro Castro-García<sup>a</sup>, Manuel Sánchez-Andújar<sup>a\*</sup>, Alessandro Stroppa<sup>g\*</sup>, María Antonia Señarís-Rodríguez<sup>a</sup>

<sup>a</sup> Department of Chemistry, Faculty of Sciences and CICA, University of A Coruña, Campus A Coruña, 15071 A Coruña, Spain.

<sup>b</sup> MALTA-Consolider Team, Departamento de Química Física, Facultad de Ciencias Químicas, Universidad Complutense de Madrid, 28040 Madrid, Spain

<sup>c</sup> Department of Physics and International Center of Quantum and Molecular Structures, Shanghai University, Shanghai 200444, China

<sup>d</sup> Materials Genome Institute, Shanghai Key Laboratory of High Temperature Superconductors, Shanghai University, Shanghai 200444, China

<sup>e</sup> Key Laboratory of Computational Physical Sciences (Ministry of Education), State Key Laboratory of Surface Physics, Department of Physics, Fudan University, Shanghai 200433, China

<sup>f</sup> International Centre for Quantum and Molecular Structures (ICQMS), College of Sciences, Shanghai University, 99 Shangda Road, 200444 Shanghai, China.

<sup>g</sup> CNR-SPIN, c/o Dip.to di Scienze Fisiche e Chimiche - Via Vetoio - 67010 - Coppito (AQ), Italy

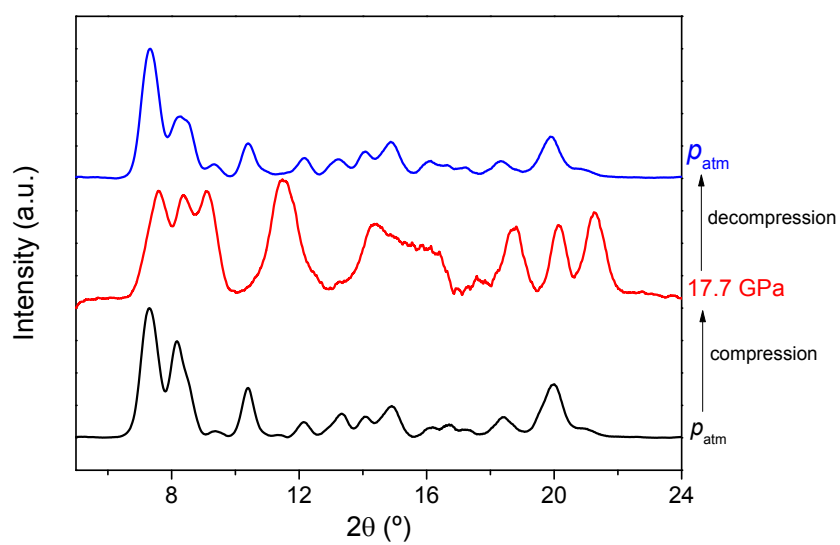

**Figure S1.** PXRD patterns of  $[\text{NH}_4][\text{Cd}(\text{HCOO})_3]$  upon compression ( $p_{\text{atm}} \rightarrow 17.7 \text{ GPa}$ ) and decompression ( $17.7 \text{ GPa} \rightarrow p_{\text{atm}}$ ) at room temperature.

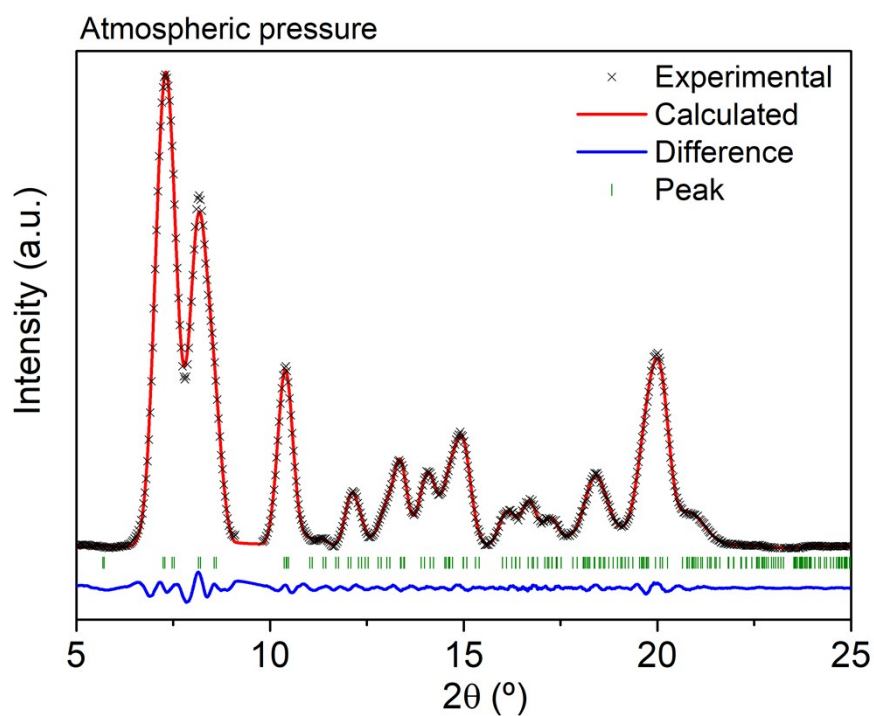

**Figure S2.** Le Bail fitting of X-ray powder diffraction patterns for the  $[\text{NH}_4][\text{Cd}(\text{HCOO})_3]$  at atmospheric pressure to LP-phase. Note: Experimental (black cross), calculated (red solid line) and difference (blue solid line at the bottom) profiles. The tick green marks indicate the positions of the allowed Bragg reflections.

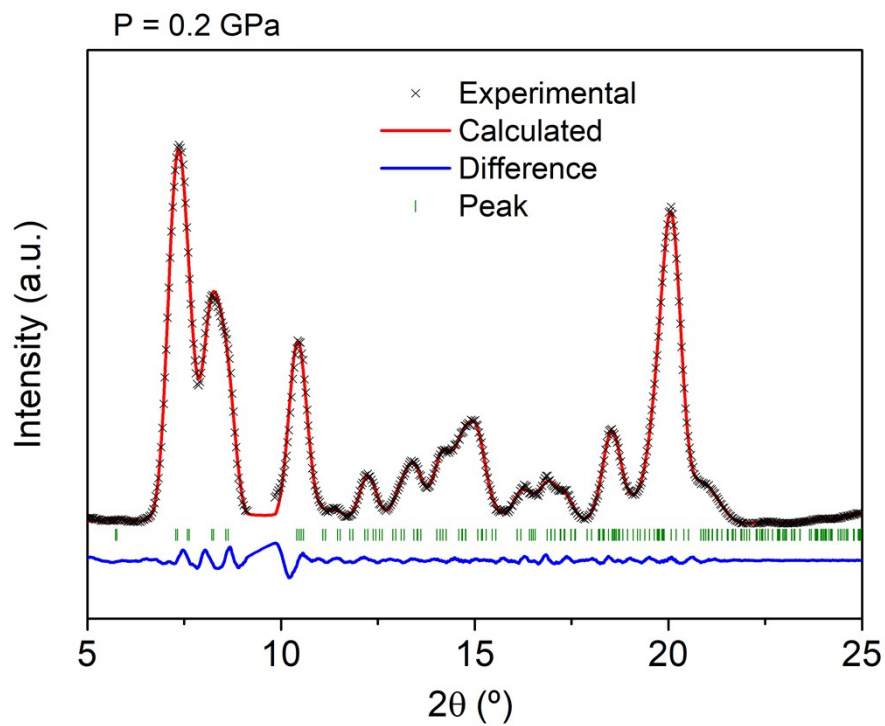

**Figure S3.** Le Bail fitting of X-ray powder diffraction patterns for the  $[\text{NH}_4][\text{Cd}(\text{HCOO})_3]$  at  $p = 0.2$  GPa to LP-phase. Note: Experimental (black cross), calculated (red solid line) and difference (blue solid line at the bottom) profiles. The tick green marks indicate the positions of the allowed Bragg reflections.

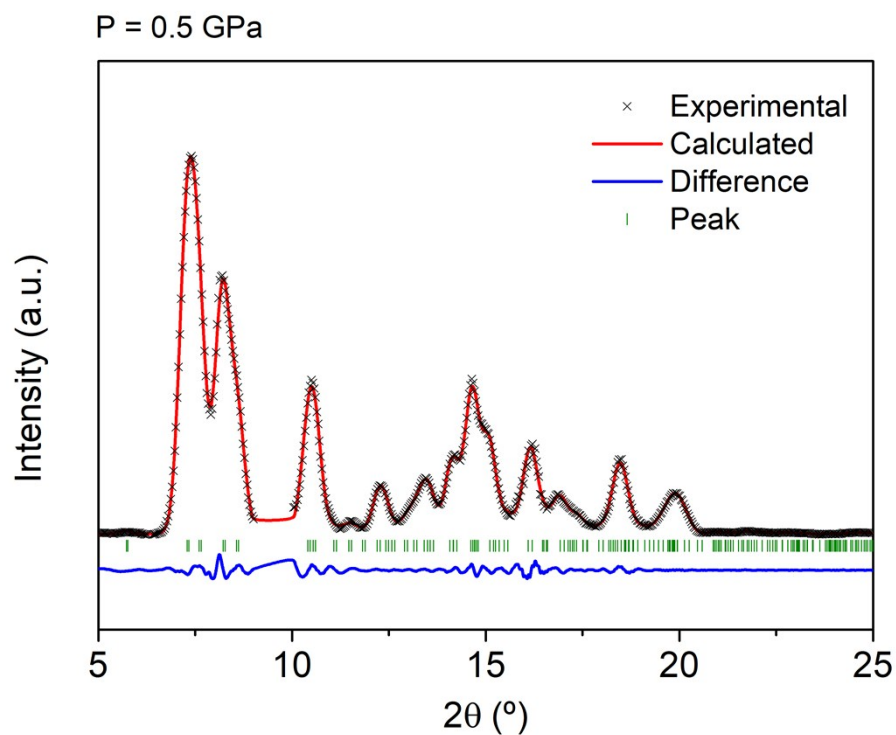

**Figure S4.** Le Bail fitting of X-ray powder diffraction patterns for the [NH<sub>4</sub>][Cd(HCOO)<sub>3</sub>] at  $p = 0.5$  GPa to LP-phase. Note: Experimental (black cross), calculated (red solid line) and difference (blue solid line at the bottom) profiles. The tick green marks indicate the positions of the allowed Bragg reflections.

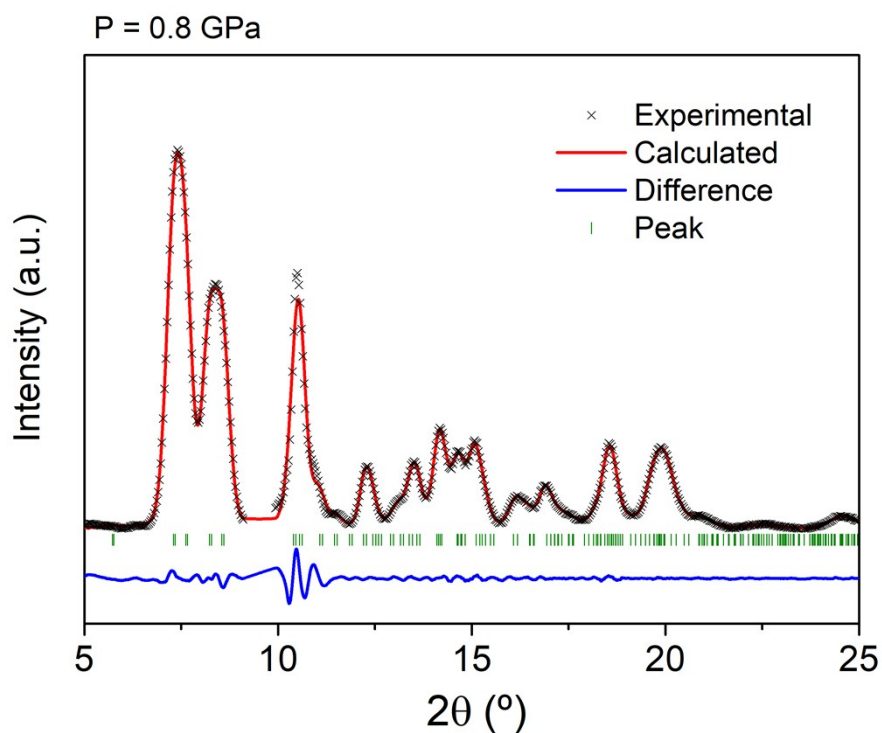

**Figure S5.** Le Bail fitting of X-ray powder diffraction patterns for the [NH<sub>4</sub>][Cd(HCOO)<sub>3</sub>] at  $p = 0.8$  GPa to LP-phase. Note: Experimental (black cross), calculated (red solid line) and difference (blue solid line at the bottom) profiles. The tick green marks indicate the positions of the allowed Bragg reflections.

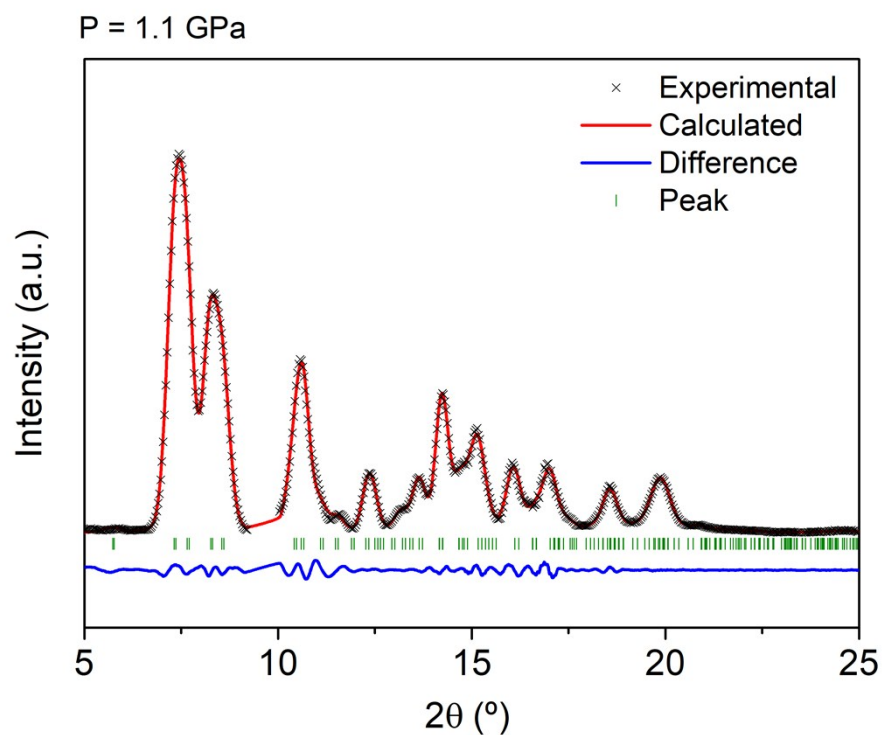

**Figure S6.** Le Bail fitting of X-ray powder diffraction patterns for the  $[\text{NH}_4][\text{Cd}(\text{HCOO})_3]$  at  $p = 1.1$  GPa to LP-phase. Note: Experimental (black cross), calculated (red solid line) and difference (blue solid line at the bottom) profiles. The tick green marks indicate the positions of the allowed Bragg reflections.

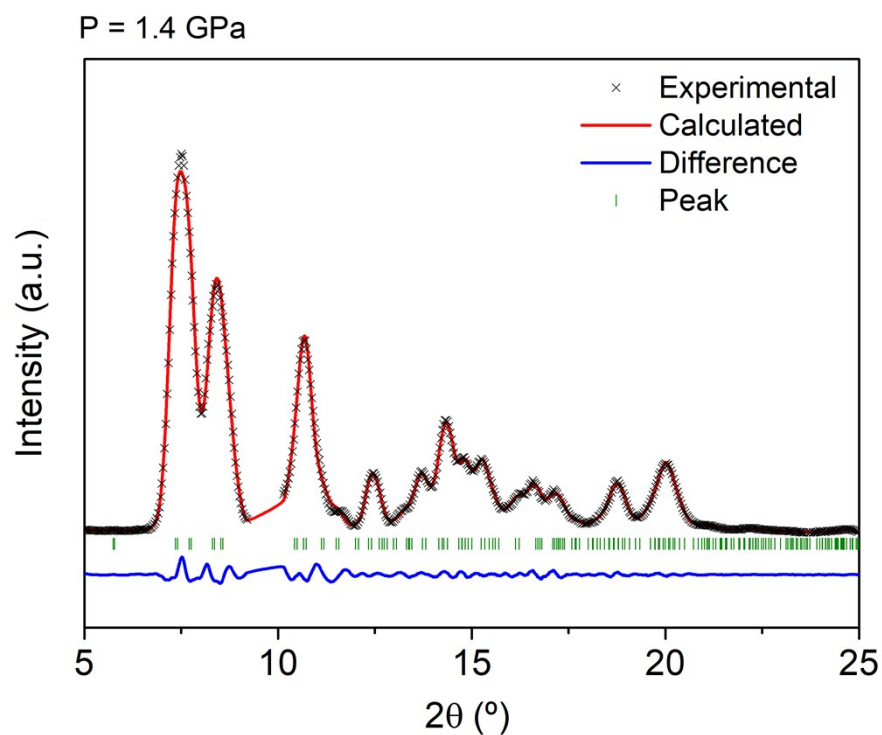

**Figure S7.** Le Bail fitting of X-ray powder diffraction patterns for the  $[\text{NH}_4][\text{Cd}(\text{HCOO})_3]$  at  $p = 1.4$  GPa to LP-phase. Note: Experimental (black cross), calculated (red solid line) and difference (blue solid line at the bottom) profiles. The tick green marks indicate the positions of the allowed Bragg reflections.



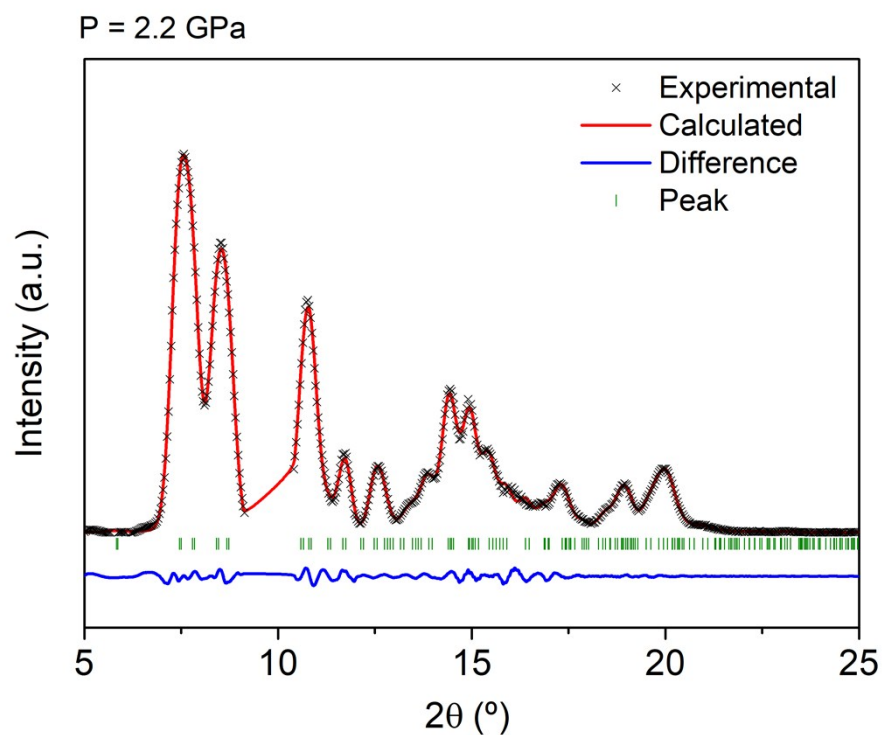

**Figure S8.** Le Bail fitting of X-ray powder diffraction patterns for the  $[\text{NH}_4][\text{Cd}(\text{HCOO})_3]$  at  $p = 2.2$  GPa to LP-phase. Note: Experimental (black cross), calculated (red solid line) and difference (blue solid line at the bottom) profiles. The tick green marks indicate the positions of the allowed Bragg reflections.

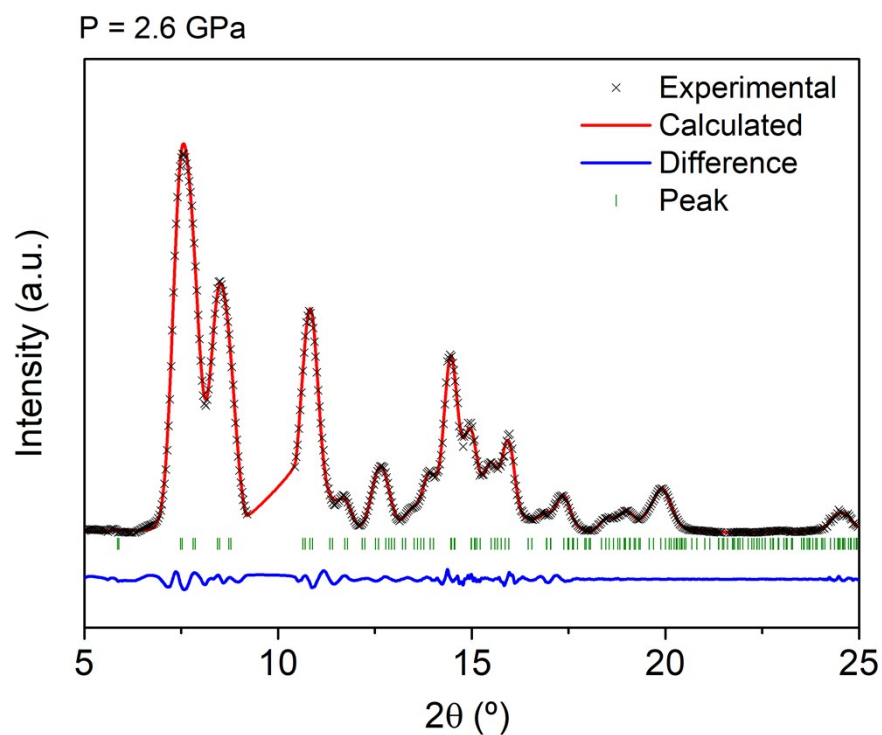

**Figure S9.** Le Bail fitting of X-ray powder diffraction patterns for the  $[\text{NH}_4][\text{Cd}(\text{HCOO})_3]$  at  $p = 2.6$  GPa to LP-phase. Note: Experimental (black cross), calculated (red solid line) and difference (blue solid line at the bottom) profiles. The tick green marks indicate the positions of the allowed Bragg reflections.

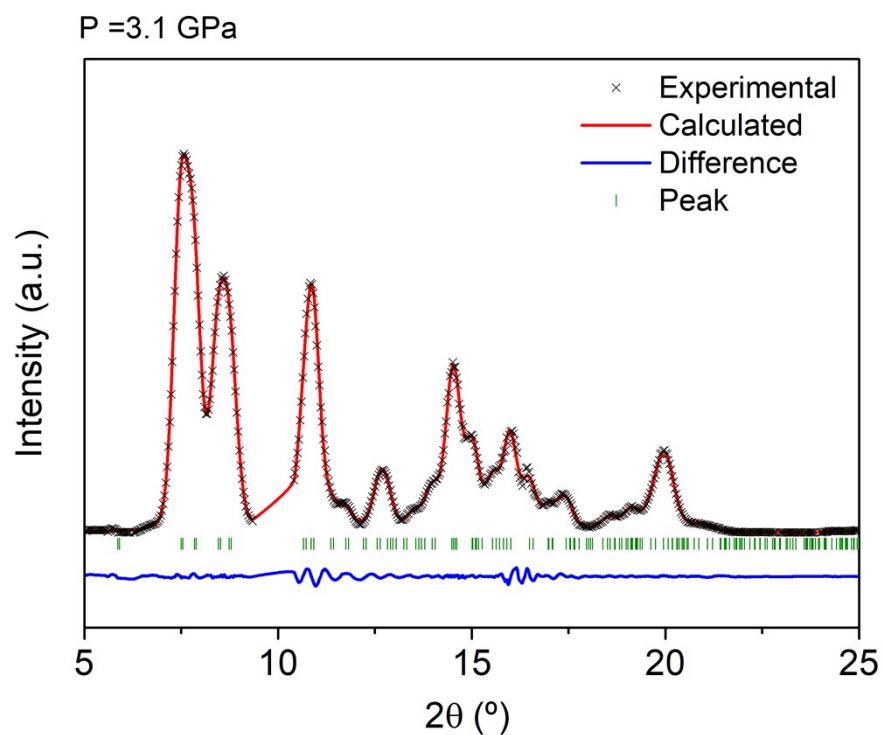

**Figure S10.** Le Bail fitting of X-ray powder diffraction patterns for the  $[\text{NH}_4][\text{Cd}(\text{HCOO})_3]$  at  $p = 3.1$  GPa to LP-phase. Note: Experimental (black cross), calculated (red solid line) and difference (blue solid line at the bottom) profiles. The tick green marks indicate the positions of the allowed Bragg reflections.

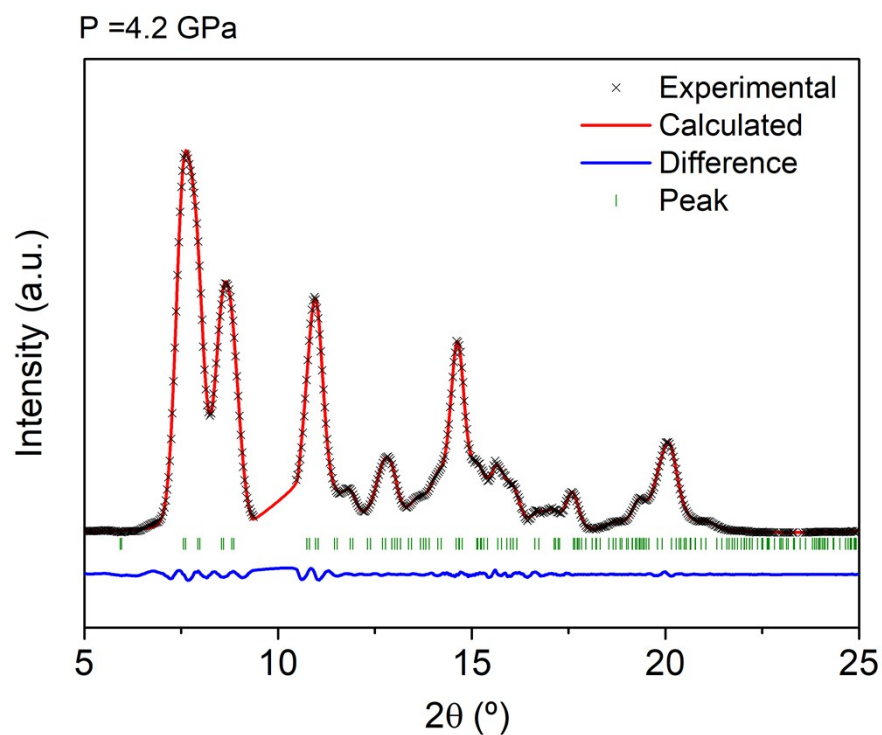

**Figure S11.** Le Bail fitting of X-ray powder diffraction patterns for the  $[\text{NH}_4][\text{Cd}(\text{HCOO})_3]$  at  $p = 4.2$  GPa to LP-phase. Note: Experimental (black cross), calculated (red solid line) and difference (blue solid line at the bottom) profiles. The tick green marks indicate the positions of the allowed Bragg reflections.

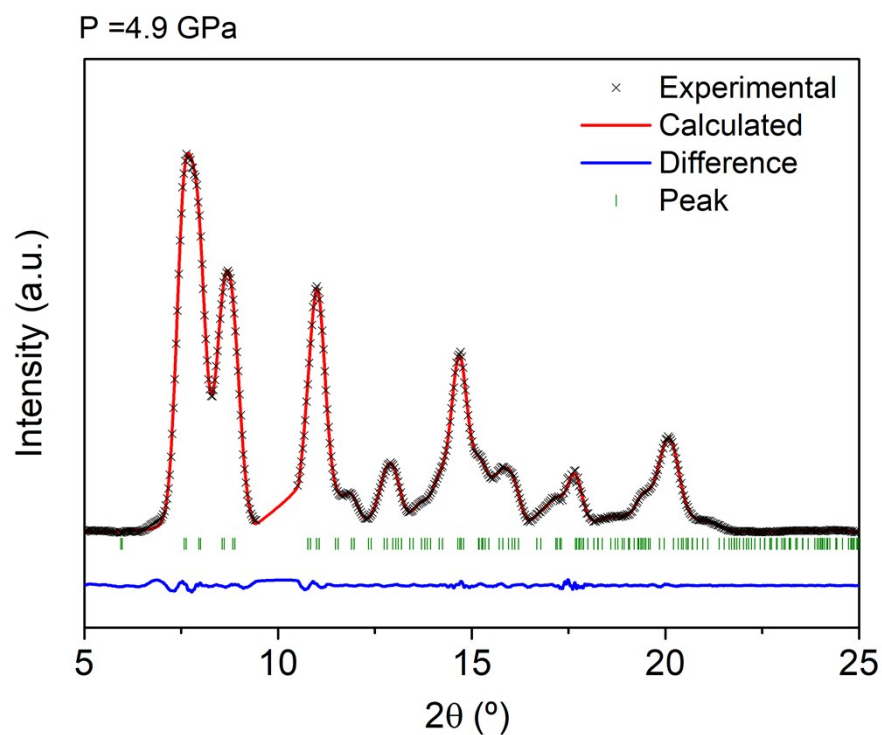

**Figure S12.** Le Bail fitting of X-ray powder diffraction patterns for the  $[\text{NH}_4][\text{Cd}(\text{HCOO})_3]$  at  $p = 4.9$  GPa to LP-phase. Note: Experimental (black cross), calculated (red solid line) and difference (blue solid line at the bottom) profiles. The tick green marks indicate the positions of the allowed Bragg reflections.

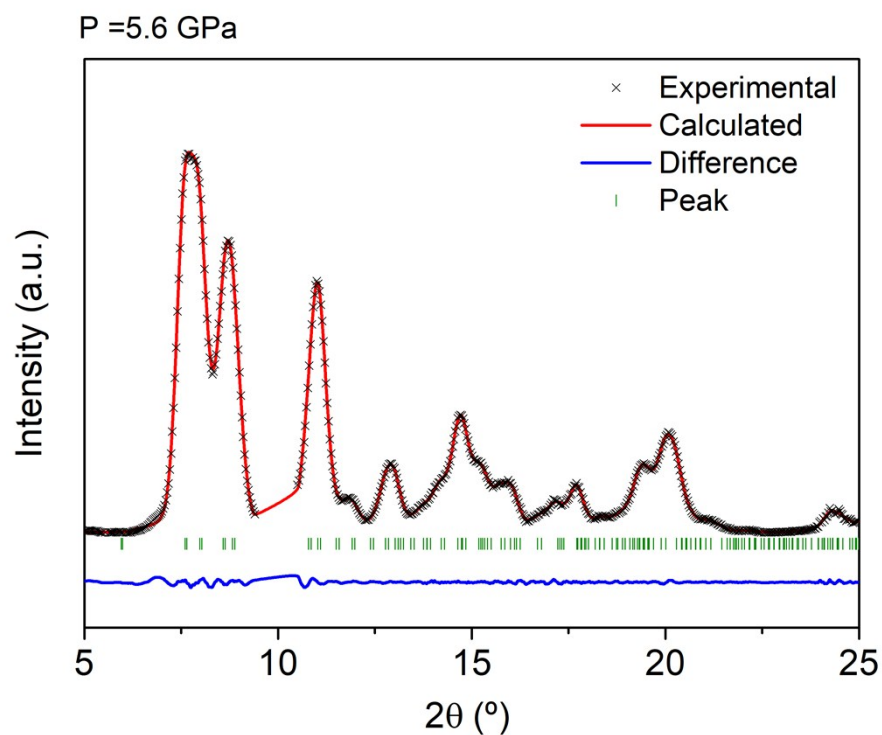

**Figure S13.** Le Bail fitting of X-ray powder diffraction patterns for the  $[\text{NH}_4][\text{Cd}(\text{HCOO})_3]$  at  $p = 5.6$  GPa to LP-phase. Note: Experimental (black cross), calculated (red solid line) and difference (blue solid line at the bottom) profiles. The tick green marks indicate the positions of the allowed Bragg reflections.

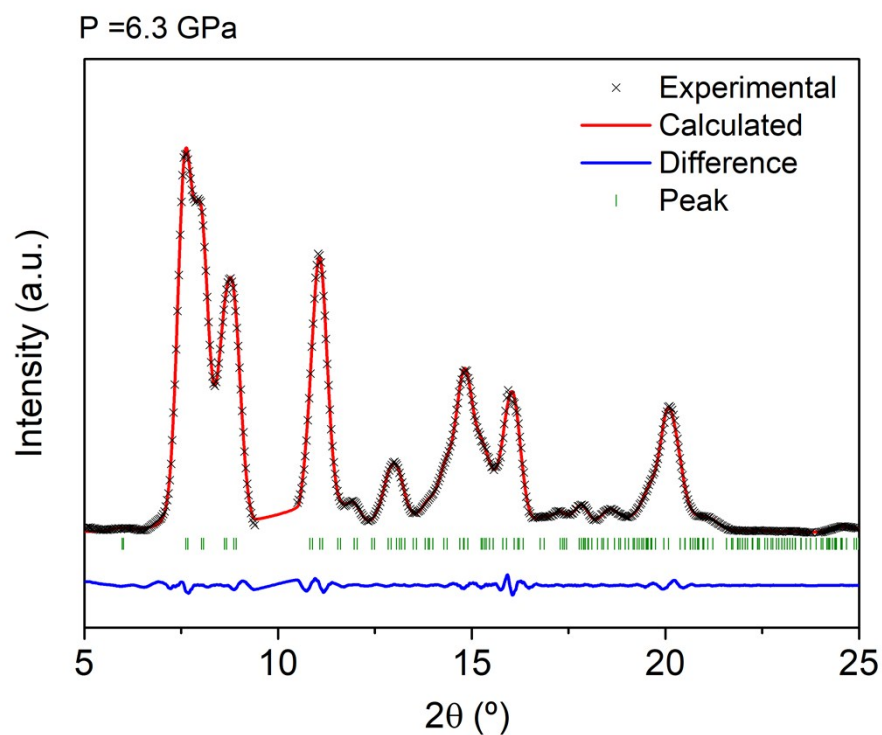

**Figure S14.** Le Bail fitting of X-ray powder diffraction patterns for the  $[\text{NH}_4][\text{Cd}(\text{HCOO})_3]$  at  $p = 6.3$  GPa to LP-phase. Note: Experimental (black cross), calculated (red solid line) and difference (blue solid line at the bottom) profiles. The tick green marks indicate the positions of the allowed Bragg reflections.

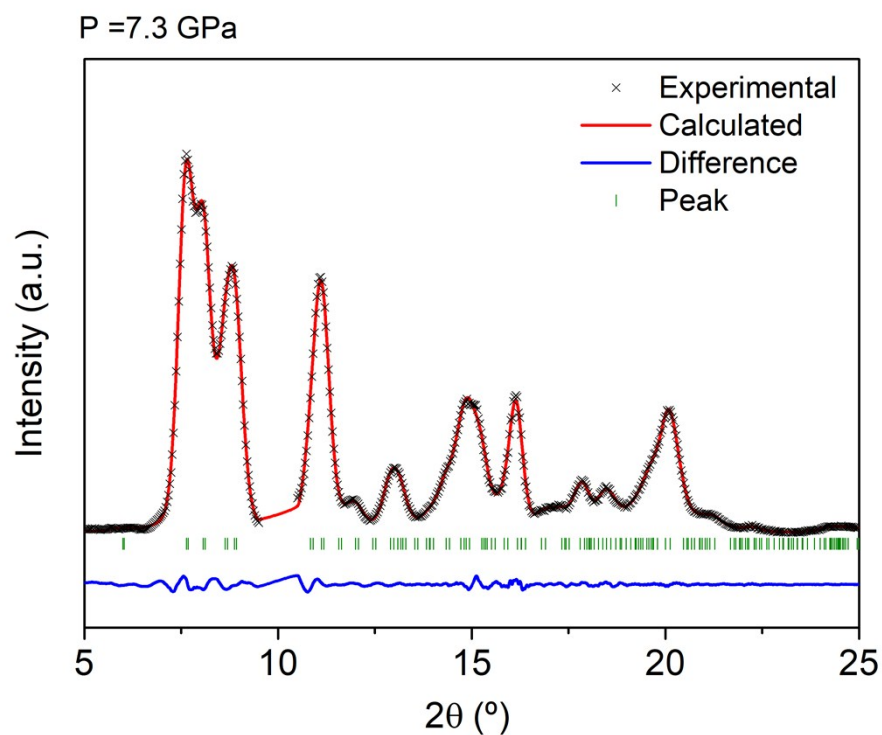

**Figure S15.** Le Bail fitting of X-ray powder diffraction patterns for the  $[\text{NH}_4][\text{Cd}(\text{HCOO})_3]$  at  $p = 7.3$  GPa to LP-phase. Note: Experimental (black cross), calculated (red solid line) and difference (blue solid line at the bottom) profiles. The tick green marks indicate the positions of the allowed Bragg reflections.



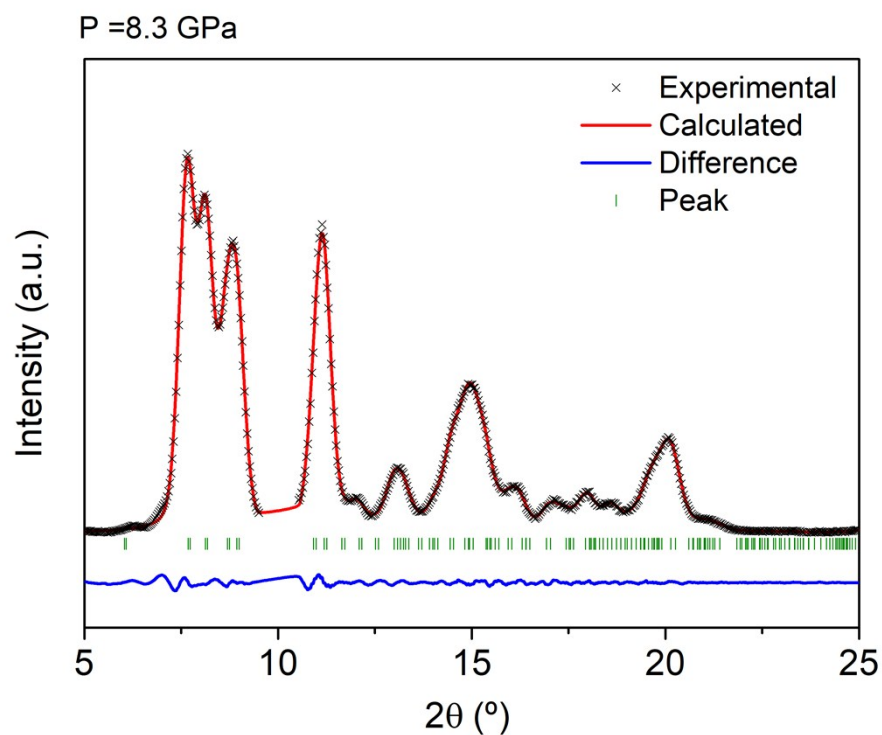

**Figure S16.** Le Bail fitting of X-ray powder diffraction patterns for the  $[\text{NH}_4][\text{Cd}(\text{HCOO})_3]$  at  $p = 8.3$  GPa to LP-phase. Note: Experimental (black cross), calculated (red solid line) and difference (blue solid line at the bottom) profiles. The tick green marks indicate the positions of the allowed Bragg reflections.

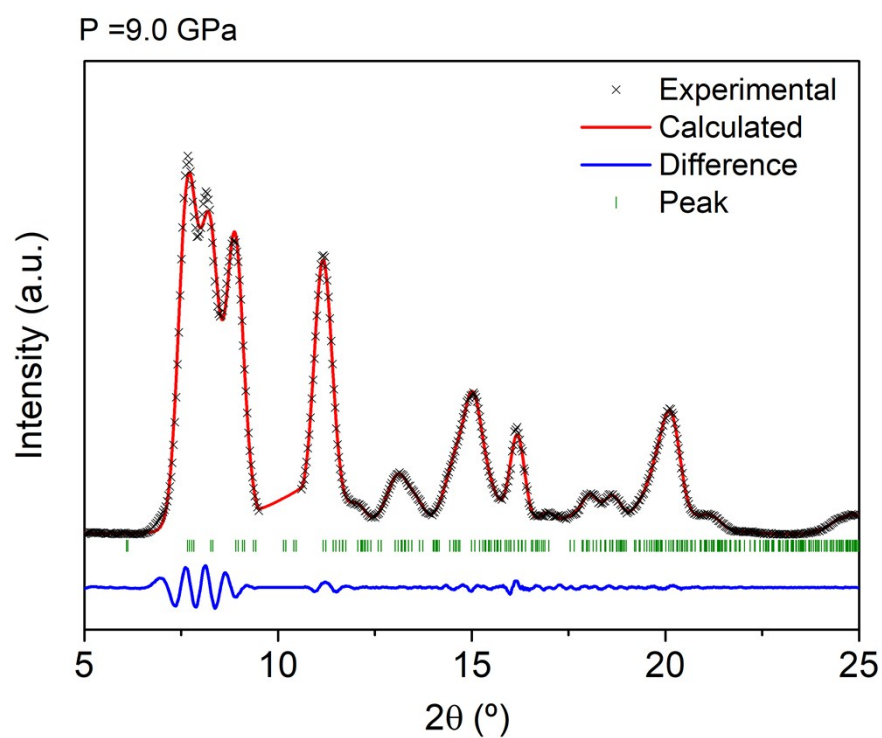

**Figure S17.** Le Bail fitting of X-ray powder diffraction patterns for the  $[\text{NH}_4][\text{Cd}(\text{HCOO})_3]$  at  $p = 9.0$  GPa to HP-phase. Note: Experimental (black cross), calculated (red solid line) and difference (blue solid line at the bottom) profiles. The tick green marks indicate the positions of the allowed Bragg reflections.

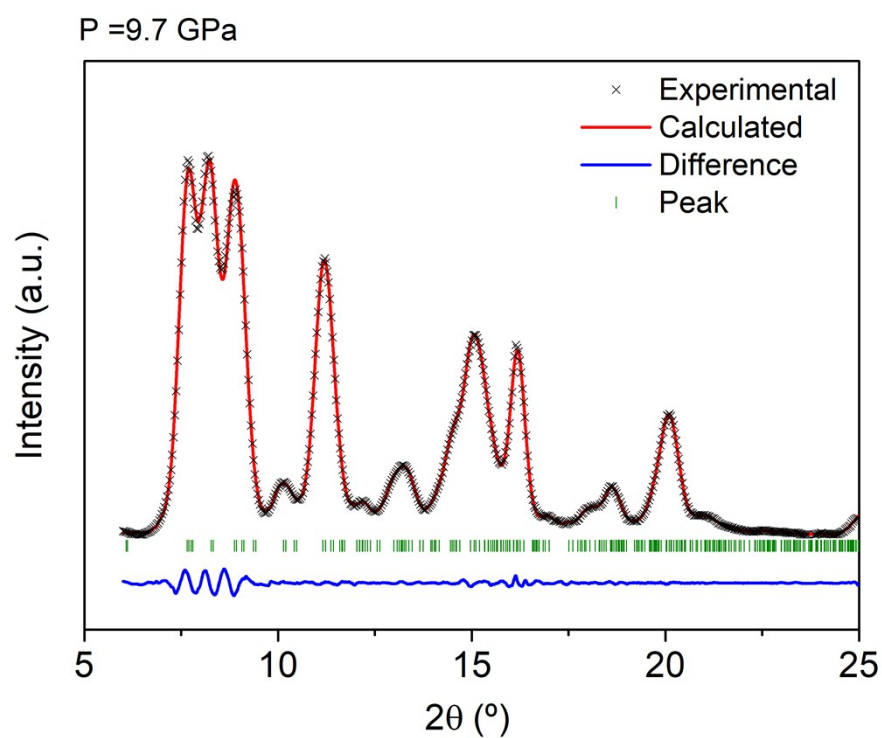

**Figure S18.** Le Bail fitting of X-ray powder diffraction patterns for the  $[\text{NH}_4][\text{Cd}(\text{HCOO})_3]$  at  $p = 9.7$  GPa to HP-phase. Note: Experimental (black cross), calculated (red solid line) and difference (blue solid line at the bottom) profiles. The tick green marks indicate the positions of the allowed Bragg reflections.

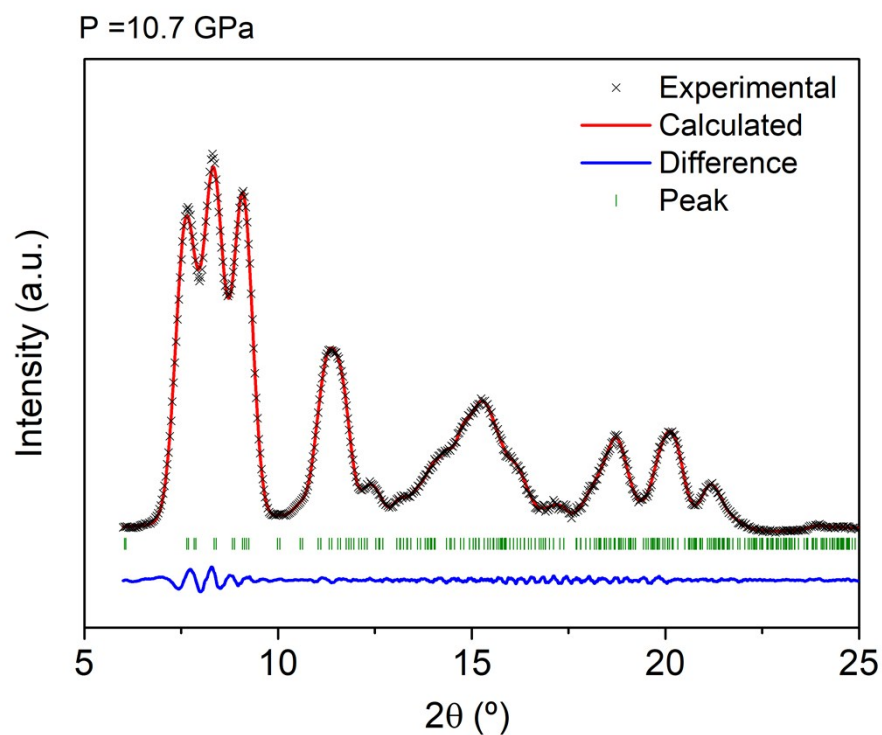

**Figure S19.** Le Bail fitting of X-ray powder diffraction patterns for the  $[\text{NH}_4][\text{Cd}(\text{HCOO})_3]$  at  $p = 10.7$  GPa to HP-phase. Note: Experimental (black cross), calculated (red solid line) and difference (blue solid line at the bottom) profiles. The tick green marks indicate the positions of the allowed Bragg reflections.

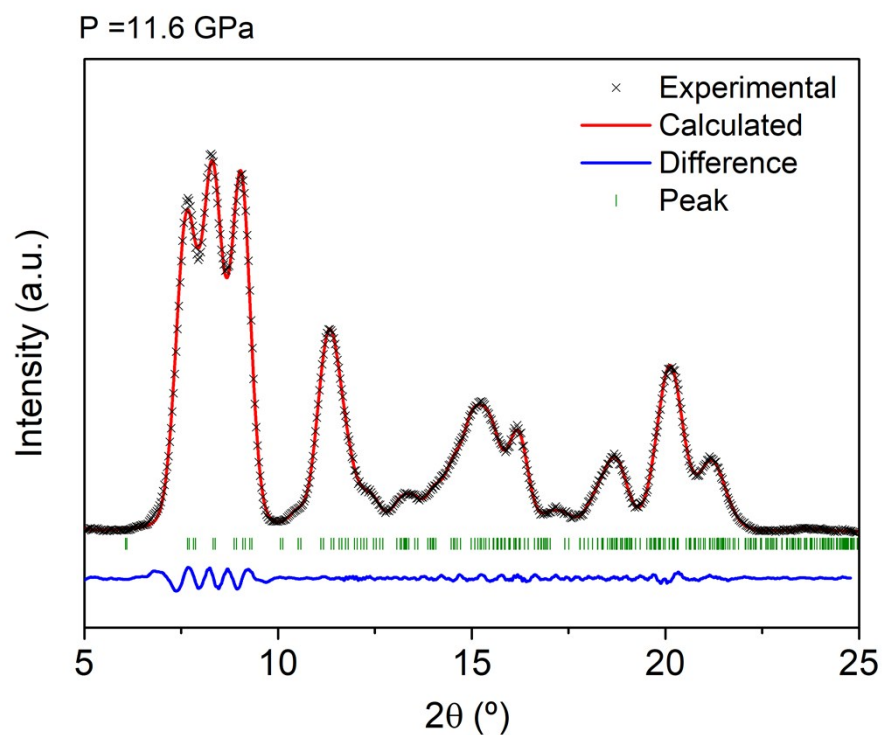

**Figure S20.** Le Bail fitting of X-ray powder diffraction patterns for the  $[\text{NH}_4][\text{Cd}(\text{HCOO})_3]$  at  $p = 11.6$  GPa to HP-phase. Note: Experimental (black cross), calculated (red solid line) and difference (blue solid line at the bottom) profiles. The tick green marks indicate the positions of the allowed Bragg reflections.

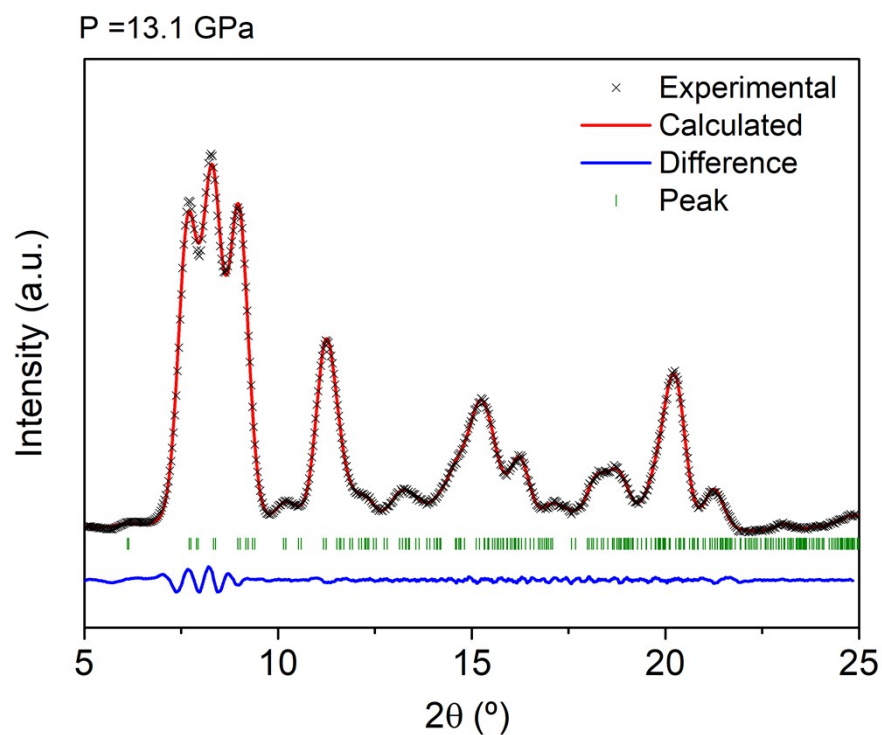

**Figure S21.** Le Bail fitting of X-ray powder diffraction patterns for the  $[\text{NH}_4][\text{Cd}(\text{HCOO})_3]$  at  $p = 13.1$  GPa to HP-phase. Note: Experimental (black cross), calculated (red solid line) and difference (blue solid line at the bottom) profiles. The tick green marks indicate the positions of the allowed Bragg reflections.

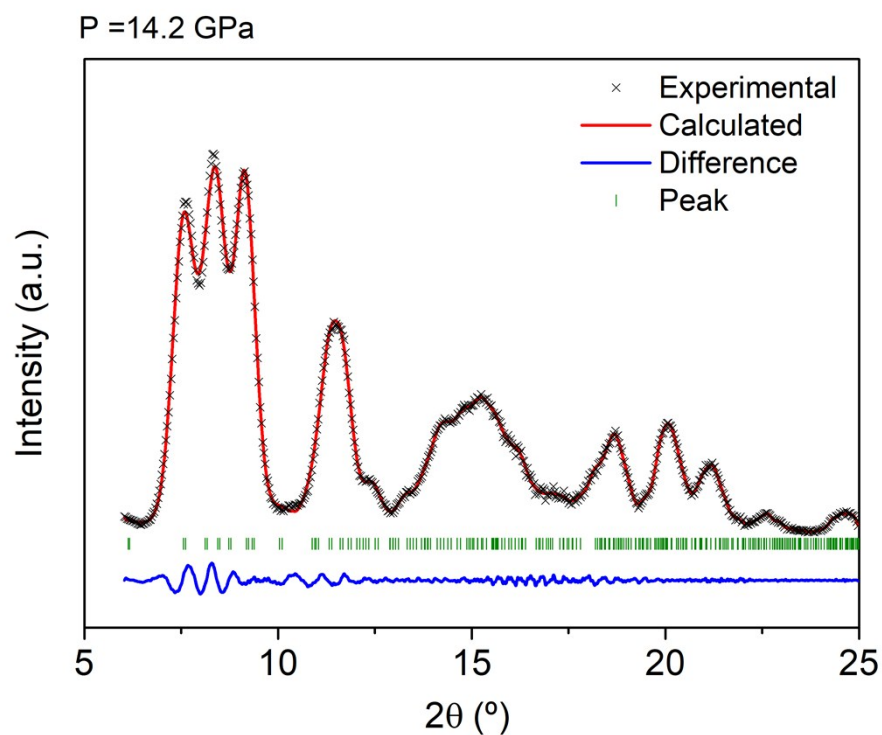

**Figure S22.** Le Bail fitting of X-ray powder diffraction patterns for the  $[\text{NH}_4][\text{Cd}(\text{HCOO})_3]$  at  $p = 14.2$  GPa to HP-phase. Note: Experimental (black cross), calculated (red solid line) and difference (blue solid line at the bottom) profiles. The tick green marks indicate the positions of the allowed Bragg reflections.

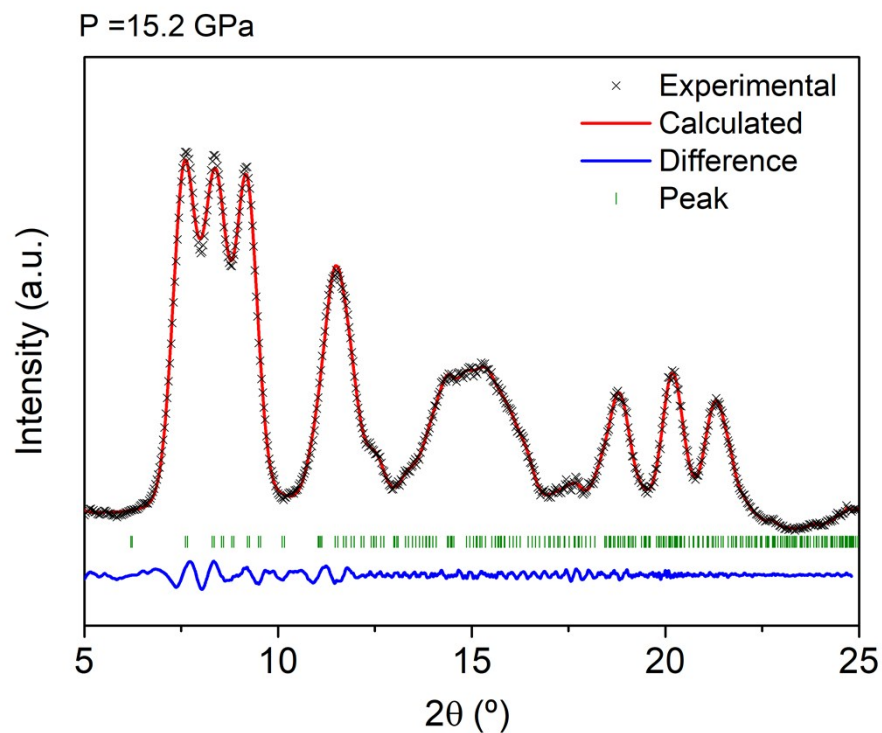

**Figure S23.** Le Bail fitting of X-ray powder diffraction patterns for the  $[\text{NH}_4][\text{Cd}(\text{HCOO})_3]$  at  $p = 15.2$  GPa to HP-phase. Note: Experimental (black cross), calculated (red solid line) and difference (blue solid line at the bottom) profiles. The tick green marks indicate the positions of the allowed Bragg reflections.



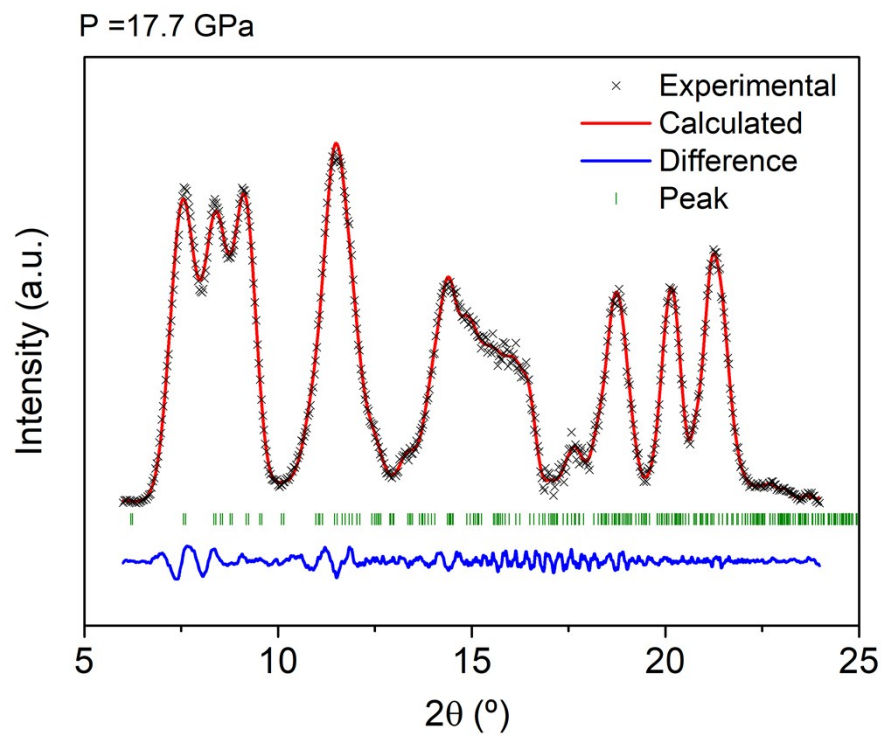

**Figure S24.** Le Bail fitting of X-ray powder diffraction patterns for the  $[\text{NH}_4][\text{Cd}(\text{HCOO})_3]$  at  $p = 17.7$  GPa to HP-phase. Note: Experimental (black cross), calculated (red solid line) and difference (blue solid line at the bottom) profiles. The tick green marks indicate the positions of the allowed Bragg reflections.

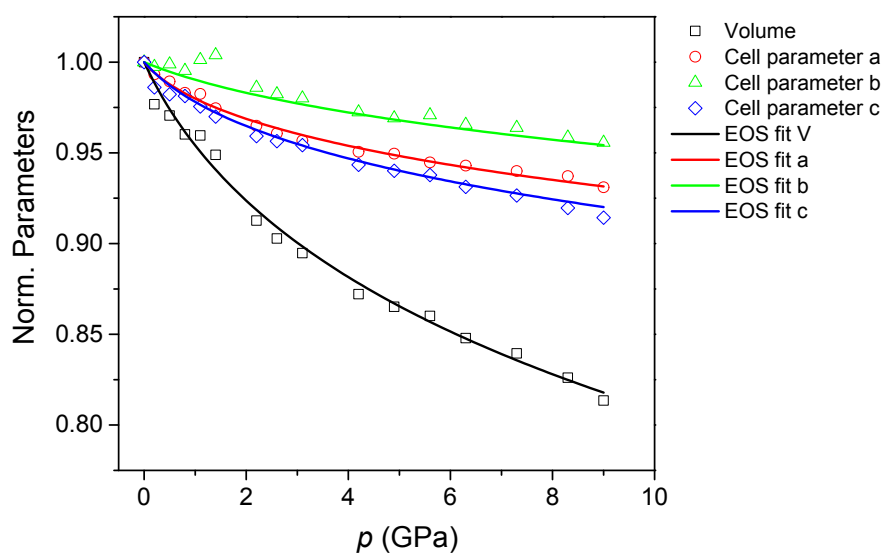

**Figure S25.** Evolution of the unit cell parameters and volume as a function of pressure for the LP-phase. The experimental data obtained from high-pressure PXRD are shown as dots while the solid lines represent the second-order Birch–Murnaghan fits.

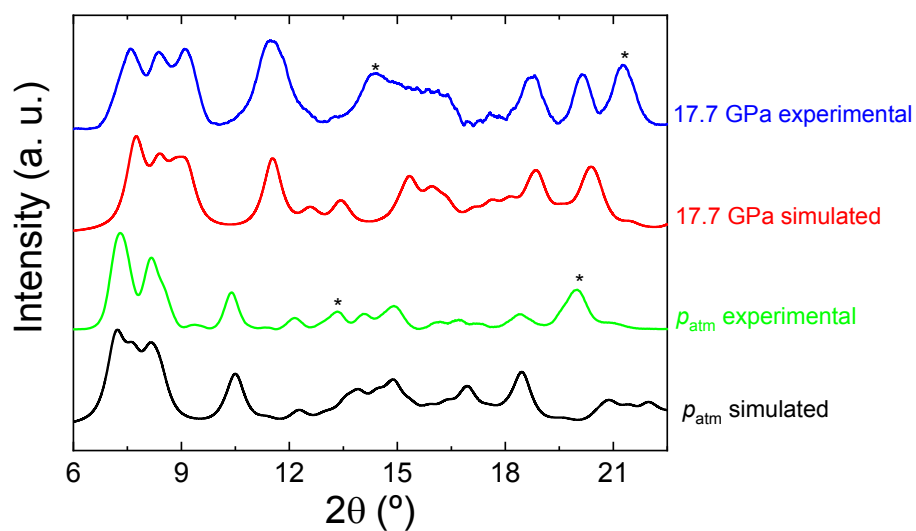

**Figure S26.** Experimental PXRD patterns for the  $[\text{NH}_4][\text{Cd}(\text{HCOO})_3]$  at atmospheric pressure and 17.7 GPa compared with their simulated profiles from the crystal structures at room temperature. The peaks of the simulated profiles have been anchored to facilitate comparison with the experimental ones. The asterisks show peaks with strong preferred orientation due to the lamellar habit of crystals.

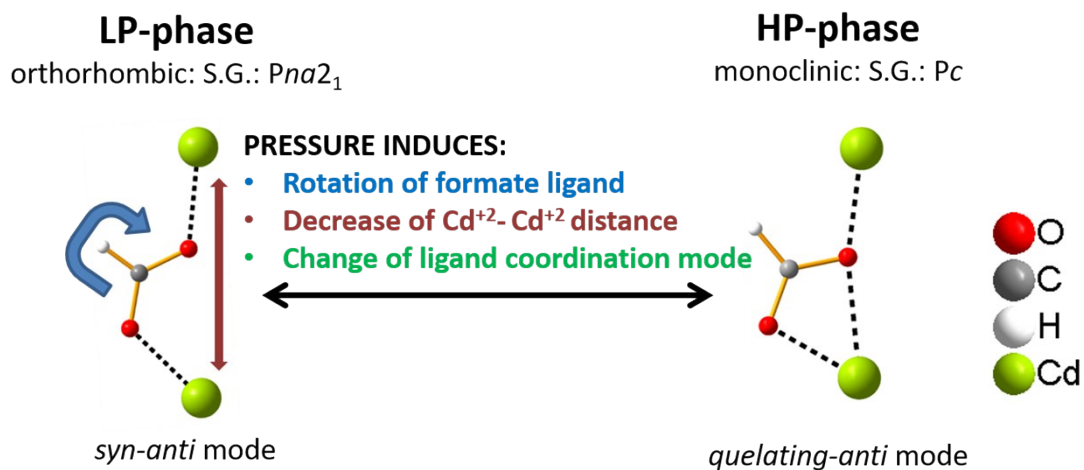

**Figure S27.** Diagram showing the main changes on the crystal structure caused by external pressure, namely rotation of the formate ligand, change of ligand coordination mode and decrease of the  $\text{Cd}^{2+}$ - $\text{Cd}^{2+}$  distance.

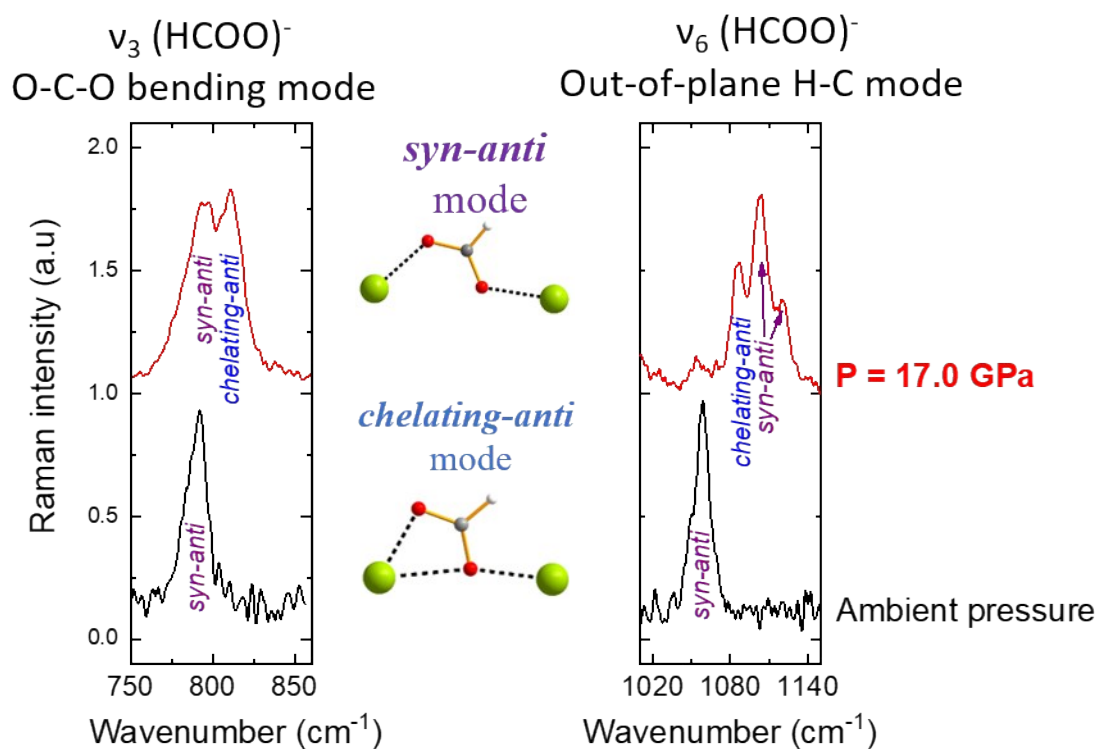

**Figure S28.** Enlarged view of the experimental Raman spectra at ambient pressure (black line) and  $P = 17.0 \text{ GPa}$  (red line) corresponding to the spectral ranges  $750\text{--}850 \text{ cm}^{-1}$  and  $1000\text{--}1150 \text{ cm}^{-1}$ , where the Raman modes corresponding to the  $\nu_3 (\text{HCOO}_3^-)$  (symmetric O-C-O bending) and  $\nu_6 (\text{HCOO}_3^-)$  (out of plane H-C mode) can be seen. The vibrational modes have been assigned to the formate ligands in *syn-anti* or *chelating-anti* bridging mode by our DFT calculations. For experimental details about the collection of Raman spectra, see reference 31 of manuscript.

**Table S1.-** Unit cell parameters and R-factors of [NH<sub>4</sub>][Cd(HCOO)<sub>3</sub>] as a function of pressure as obtained from Le Bail fitting of the PXRD-patterns.

| Pressure (GPa) | <i>a</i> (Å) | <i>b</i> (Å) | <i>c</i> (Å) | <i>Beta</i> (°) | R <sub>wp</sub> | R <sub>exp</sub> |
|----------------|--------------|--------------|--------------|-----------------|-----------------|------------------|
| 1E-4           | 6.960(1)     | 9.507(2)     | 10.880(2)    |                 | 5.18%           | 2.80%            |
| 0.2            | 6.913(1)     | 9.483(2)     | 10.728(2)    |                 | 5.54%           | 3.09%            |
| 0.5            | 6.886(1)     | 9.496(1)     | 10.687(2)    |                 | 5.17%           | 3.06%            |
| 0.8            | 6.842(2)     | 9.462(3)     | 10.677(3)    |                 | 11.10%          | 5.14%            |
| 1.1            | 6.838(1)     | 9.519(2)     | 10.614(2)    |                 | 7.95%           | 3.91%            |
| 1.4            | 6.783(1)     | 9.544(2)     | 10.553(1)    |                 | 6.52%           | 4.77%            |
| 2.2            | 6.716(1)     | 9.374(2)     | 10.436(1)    |                 | 6.37%           | 3.52%            |
| 2.6            | 6.687(2)     | 9.340(3)     | 10.406(2)    |                 | 6.52%           | 3.72%            |
| 3.1            | 6.659(2)     | 9.318(2)     | 10.382(2)    |                 | 6.42%           | 4.19%            |
| 4.2            | 6.616(1)     | 9.245(2)     | 10.264(1)    |                 | 5.35%           | 2.58%            |
| 4.9            | 6.609(2)     | 9.214(2)     | 10.228(1)    |                 | 4.44%           | 2.31%            |
| 5.6            | 6.575(2)     | 9.230(2)     | 10.203(2)    |                 | 6.47%           | 3.36%            |
| 6.3            | 6.563(1)     | 9.180(1)     | 10.132(1)    |                 | 7.18%           | 3.31%            |
| 7.3            | 6.542(1)     | 9.164(1)     | 10.080(1)    |                 | 4.31%           | 2.49%            |
| 8.3            | 6.523(1)     | 9.113(1)     | 10.005(1)    |                 | 4.34%           | 2.49%            |
| 9              | 9.862(1)     | 9.073(2)     | 6.299(1)     | 91.47(1)        | 5.22%           | 2.67%            |
| 9.7            | 9.826(1)     | 8.909(1)     | 6.325(1)     | 91.27(1)        | 4.51%           | 2.22%            |
| 10.7           | 9.769(1)     | 8.888(1)     | 6.357(1)     | 91.34(1)        | 4.24%           | 2.60%            |
| 11.6           | 9.770(1)     | 8.912(1)     | 6.332(1)     | 91.02(1)        | 5.99%           | 3.39%            |
| 13.1           | 9.787(1)     | 8.903(1)     | 6.351(1)     | 90.97(1)        | 4.33%           | 2.43%            |
| 14.2           | 9.747(2)     | 8.815(1)     | 6.371(2)     | 91.80(1)        | 4.48%           | 2.90%            |
| 15.2           | 9.719(1)     | 8.841(1)     | 6.404(1)     | 91.45(1)        | 4.15%           | 2.64%            |
| 17.7           | 9.690(1)     | 8.839(1)     | 6.458(1)     | 91.78(1)        | 3.45%           | 2.70%            |

**Table S2.-** Atomic coordinates and lattice parameters of  $[\text{NH}_4][\text{Cd}(\text{HCOO})_3]$  at  $P=17.7$  GPa as obtained from DFT calculations

Space group:  $Pc$

$a=9.3659 \text{ \AA}$

$b=8.5974 \text{ \AA}$

$c= 6.2658 \text{ \AA}$

$\beta=90.11$

|     |         |         |         |
|-----|---------|---------|---------|
| C1  | 0.23716 | 0.74564 | 0.23741 |
| C2  | 0.36746 | 0.44473 | 0.04747 |
| C3  | 0.73638 | 0.75402 | 0.76211 |
| C4  | 0.03631 | 0.43186 | 0.14082 |
| C5  | 0.53693 | 0.06837 | 0.85945 |
| C6  | 0.86836 | 0.05638 | 0.95276 |
| Cd1 | 0.96838 | 0.74765 | 0.07576 |
| Cd2 | 0.46812 | 0.75322 | 0.92392 |
| H1  | 0.80195 | 0.01889 | 0.08976 |
| H2  | 0.19622 | 0.17997 | 0.13564 |
| H3  | 0.60264 | 0.46958 | 0.7606  |
| H4  | 0.10303 | 0.03122 | 0.23898 |
| H5  | 0.33995 | 0.75315 | 0.32127 |
| H6  | 0.8387  | 0.74499 | 0.67793 |
| H7  | 0.30025 | 0.48248 | 0.91108 |
| H8  | 0.69909 | 0.49812 | 0.98361 |
| H9  | 0.19901 | 0.00291 | 0.01624 |
| H10 | 0.78882 | 0.47252 | 0.7587  |
| H11 | 0.2891  | 0.02727 | 0.2416  |
| H12 | 0.13392 | 0.4893  | 0.08049 |
| H13 | 0.63449 | 0.01037 | 0.91975 |
| H14 | 0.69534 | 0.32076 | 0.865   |
| N1  | 0.69642 | 0.44061 | 0.84209 |
| N2  | 0.1968  | 0.06003 | 0.15805 |
| O1  | 0.97381 | 0.97121 | 0.90648 |
| O2  | 0.62252 | 0.76977 | 0.65683 |
| O3  | 0.83338 | 0.17478 | 0.85125 |
| O4  | 0.33241 | 0.32683 | 0.14993 |
| O5  | 0.73632 | 0.74264 | 0.96313 |
| O6  | 0.23639 | 0.75873 | 0.03657 |
| O7  | 0.47379 | 0.52913 | 0.09222 |
| O8  | 0.04722 | 0.31156 | 0.2481  |
| O9  | 0.54813 | 0.18817 | 0.75128 |
| O10 | 0.91846 | 0.49706 | 0.09277 |
| O11 | 0.41887 | 0.00413 | 0.90821 |
| O12 | 0.12366 | 0.72979 | 0.34275 |
